# Supplementary material for: Lateral septum DREADD activation alters male prairie vole prosocial and antisocial behaviors, not partner preferences
Source: PubMed Central journal article supplement (PMC9701193; doi:10.1038/s42003-022-04274-z), 2022-11-26
Supplement: 42003_2022_4274_MOESM1_ESM.pdf [file 42003_2022_4274_MOESM1_ESM.pdf]

Supplementary Information for

**Lateral septum DREADD activation alters male prairie vole prosocial and antisocial behaviors, not partner preferences**

Lindsay L. Sailer, Ashley H. Park, Abigail Galvez, Alexander G. Ophir\*

\*Corresponding author. Email: [ophir@cornell.edu](mailto:ophir@cornell.edu)

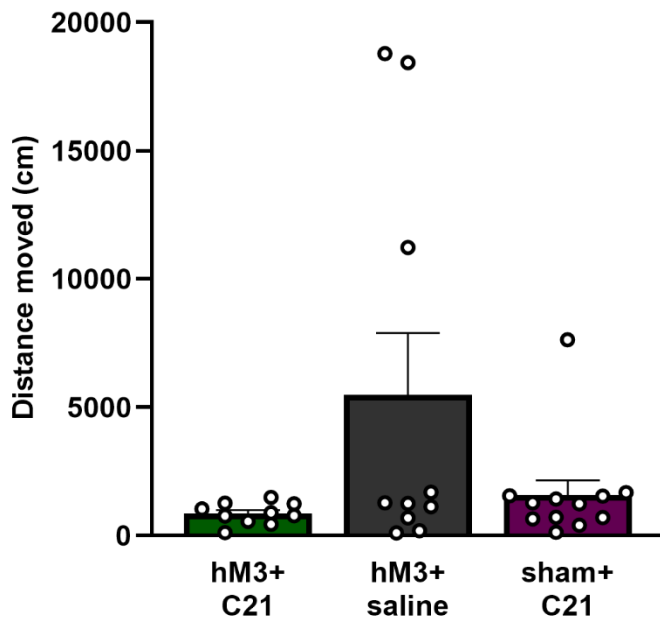

**Supplementary Figure 1 | LS activation does not affect distance moved.** Distance moved (centimeters; cm) by the hM3+C21 (green bars), hM3+saline (grey bars), and sham+C21 (purple bars) subjects during the social approach test. Data are presented as mean  $\pm$  SEM. Dots represent individual data for hM3+C21 ( $n = 10$ ), hM3+saline ( $n = 10$ ), and sham+C21 ( $n = 12$ ) subjects. (LMM, treatment effect:  $F_{(2,29)} = 3.19$ ,  $p = 0.06$ ).

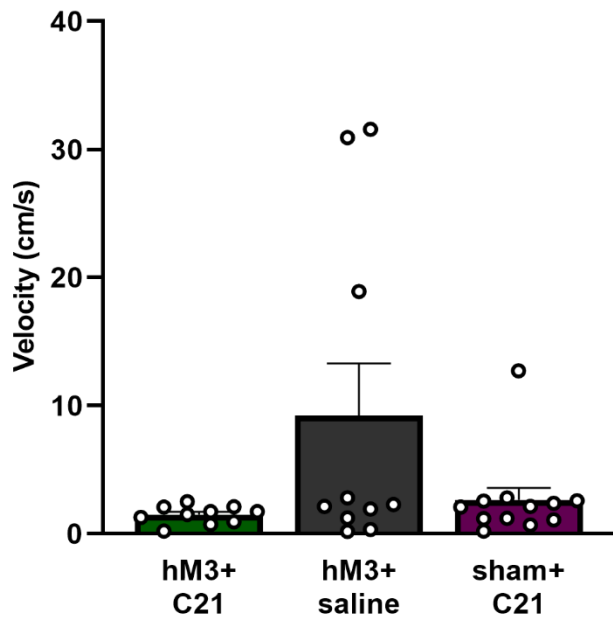

**Supplementary Figure 2 | LS activation does not affect velocity.** Velocity

(centimeters/second; cm/s) of the hM3+C21 (green bars), hM3+saline (grey bars), and sham+C21 (purple bars) subjects during the social approach test. Data are presented as mean  $\pm$  SEM. Dots represent individual data for hM3+C21 ( $n = 10$ ), hM3+saline ( $n = 10$ ), and sham+C21 ( $n = 12$ ) subjects. (LMM, treatment effect:  $F_{(2,29)} = 3.21, p = 0.06$ ).

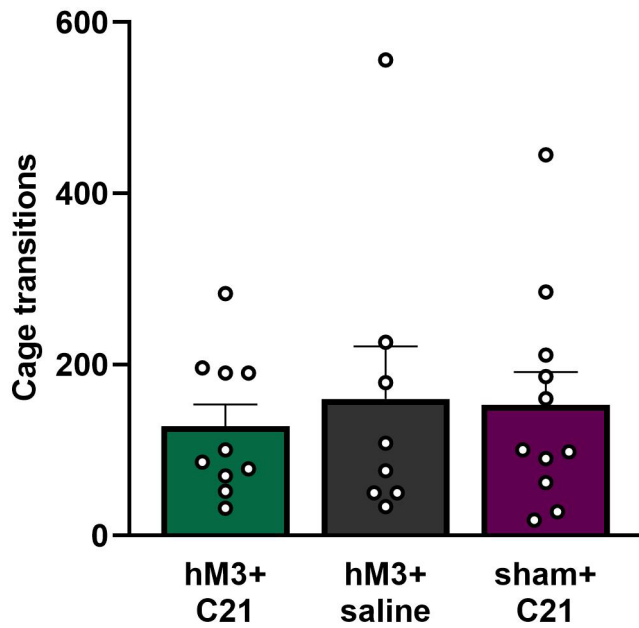

**Supplementary Figure 3 | LS activation does not affect cage transitions.** Cage transitions of the hM3+C21 (green bars), hM3+saline (grey bars), and sham+C21 (purple bars) subjects during the partner preference test. Data are presented as mean  $\pm$  SEM. Dots represent individual data for hM3+C21 ( $n = 10$ ), hM3+saline ( $n = 8$ ), and sham+C21 ( $n = 11$ ) subjects.
