# Supplementary material for: Lateral septum DREADD activation alters male prairie vole prosocial and antisocial behaviors, not partner preferences
Source: PubMed Central journal article supplement (PMC9701193; doi:10.1038/s42003-022-04274-z), 2022-11-26
Supplement: 42003_2022_4274_MOESM2_ESM.pdf [file 42003_2022_4274_MOESM2_ESM.pdf]

## Description of Additional Supplementary Files

**File name:** Supplementary Data 1

**Description:** Source Data for Figure 2a

**File name:** Supplementary Data 2

**Description:** Source Data for Figure 2b

**File name:** Supplementary Data 3

**Description:** Source Data for Figure 2

**File name:** Supplementary Data 4

**Description:** Source Data for Figure 3

**File name:** Supplementary Data 5

**Description:** Source Data for Figure 3b

**File name:** Supplementary Data 6

**Description:** Source Data for Figure 3c

**File name:** Supplementary Data 7

**Description:** Source Data for Figure 4a

**File name:** Supplementary Data 8

**Description:** Source Data for Figure 4b

**File name:** Supplementary Data 9

**Description:** Source Data for Figure 4c

**File name:** Supplementary Data 10

**Description:** Source Data for Figure 4d

**File name:** Supplementary Data 11

**Description:** Source Data for Figure 4e

**File name:** Supplementary Data 12

**Description:** Source Data for Figure 4f

**File name:** Supplementary Data 13

**Description:** Source Data for Supplementary Figure 1

**File name:** Supplementary Data 14

**Description:** Source Data for Supplementary Figure 2

**File name:** Supplementary Data 15

**Description:** Source Data for Supplementary Figure 3
